# Supplementary material
Source: Springer Nature journal article supplement (https://www.springermedizin.de/resource/supplementary/13058_2010_2756_MOESM11_ESM.pdf/9702090)

**(A)****SKBR3 cells**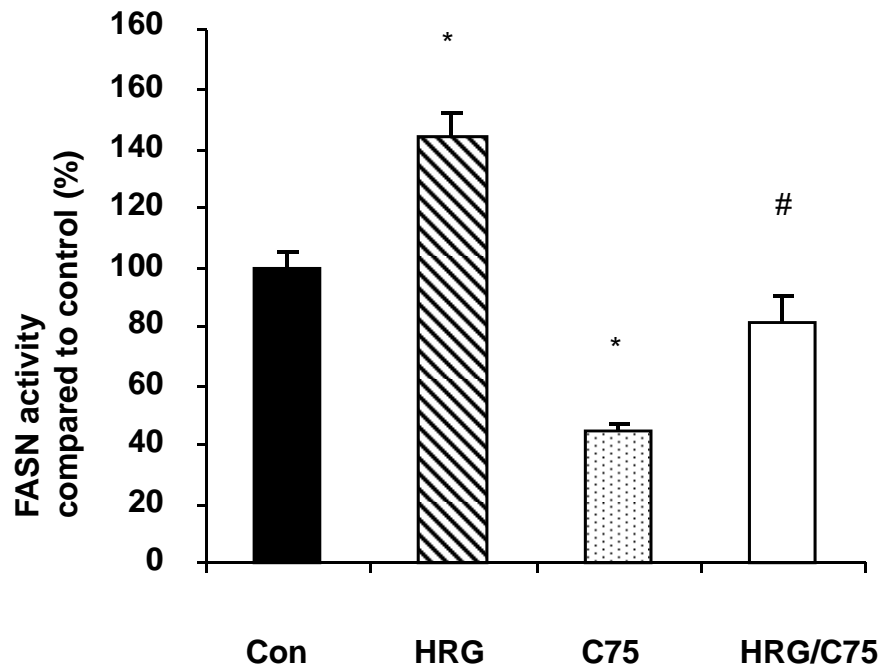**(B)****BT474 cells**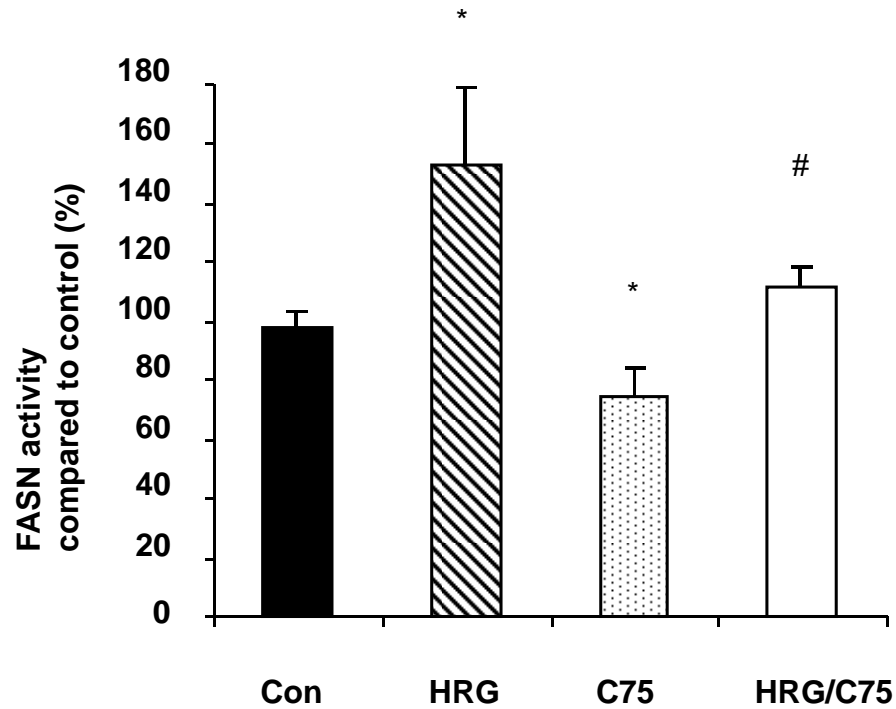

Supplement: MOESM11 [file 9702090]
